# Supplementary material
Source: PubMed Central journal article supplement (PMC6557575)
Supplement: NIHMS534187-supplement-Supporting_Information.pdf [file NIHMS534187-supplement-Supporting_Information.pdf]

## Supporting Information

**Table S1: Crystallization Conditions from Screening for *Ne c-552r***

| <i>Condition</i> | <i>Precipitant</i>                                    | <i>Salt</i>                                           | <i>Buffer</i>                      |
|------------------|-------------------------------------------------------|-------------------------------------------------------|------------------------------------|
| JCSG I-2         | 20% (w/v) PEG 6000                                    |                                                       | 0.1 M Bicine pH 8.5                |
| JCSG I-23        | 20% (w/v) PEG 3350                                    | 0.2 M Na-formate                                      |                                    |
| JCSG I-94        | 20% (w/v) PEG 6000                                    | 1.0 M LiCl                                            | 0.1M citric acid pH 4.0            |
| JCSG II-17       | 20% (w/v) PEG 6000                                    | 1.0 M LiCl                                            | 0.1 M TRIS pH 8.5                  |
| JCSG III-4       | 30% (w/v) PEG 3000                                    |                                                       | 0.1 M CHES pH 9.0                  |
| JCSG III-43      | 20% (w/v) PEG 6000                                    | 1.0 M LiCl                                            | 0.1 M HEPES pH 7.0                 |
| Index-2          | 2.0 M (NH <sub>4</sub> ) <sub>2</sub> SO <sub>4</sub> |                                                       | 0.1 M NaCH <sub>3</sub> COO pH 4.5 |
| JCSG+-1          | 50% PEG 400                                           | 0.2 M Li <sub>2</sub> SO <sub>4</sub>                 | 0.1 M NaCH <sub>3</sub> COO pH 4.5 |
| SIGMA-1          | 1.4 M NaCH <sub>3</sub> COO                           |                                                       | 0.1 M Na cacodylate pH 6.5         |
| SIGMA-20         | 30% PEG 4000                                          | 0.2 M (NH <sub>4</sub> ) <sub>2</sub> SO <sub>4</sub> | 0.1 M NaCH <sub>3</sub> COO pH 4.6 |

**Table S2: Crystallization Conditions from Screening for *Ne N64Δ***

| <i>Condition</i> | <i>Precipitant</i>                                    | <i>Salt</i>                                | <i>Buffer</i>          |
|------------------|-------------------------------------------------------|--------------------------------------------|------------------------|
| JCSG I-1         | 20% (w/v) PEG 8000                                    |                                            | 0.1M CHES pH 9.5       |
| JCSG I-2         | 20% (w/v) PEG 6000                                    |                                            | 0.1 M Bicine pH 8.5    |
| JCSG II-15       | 20% (w/v) PEG 8000                                    | 0.2 M Ca(CH <sub>3</sub> COO) <sub>2</sub> | 0.1 M Imidazole pH 8.0 |
| JCSG II-18       | 20% (w/v) PEG 6000                                    |                                            | 0.1M TRIS pH 8.5       |
| JCSG II-90       | 10% (w/v) PEG 1000<br>10% (w/v) PEG 8000              |                                            |                        |
| JCSG III-20      | 10% (w/v) PEG 3000                                    | 0.2 M Li <sub>2</sub> SO <sub>4</sub>      | 0.1 M Imidazole pH 8.0 |
| JCSG III-22      | 2.4 M (NH <sub>4</sub> ) <sub>2</sub> SO <sub>4</sub> |                                            | 0.1M TRIS pH 8.5       |
| JCSG III-37      | 1.0 M Na/K tartrate                                   | 0.2 M NaCl                                 | 0.1 M Imidazole pH 8.0 |
| JCSG IV-32       | 1.0 M di-ammonium phosphate                           | 0.2 M NaCl                                 | 0.1 M Imidazole pH 8.0 |

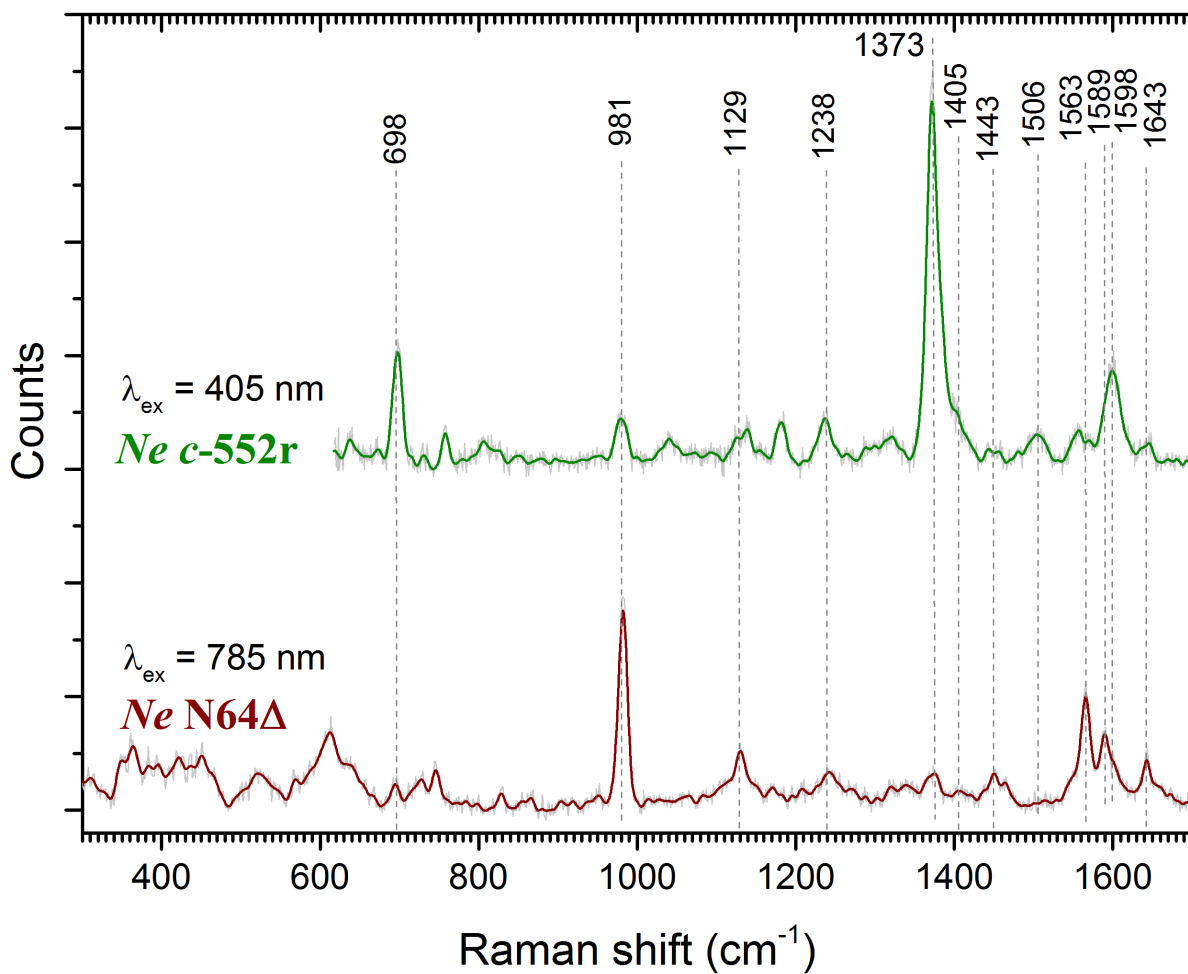

**Figure S1.** Single-crystal resonance Raman spectra of oxidized *Ne c-552r* (green) and Raman spectra of oxidized *Ne N64Δ* (red) before exposure to X-rays. Excitation wavelength for *Ne c-552r* and *Ne N64Δ* was 405 and 785 nm, respectively. The un-smoothed spectra are shown in grey.

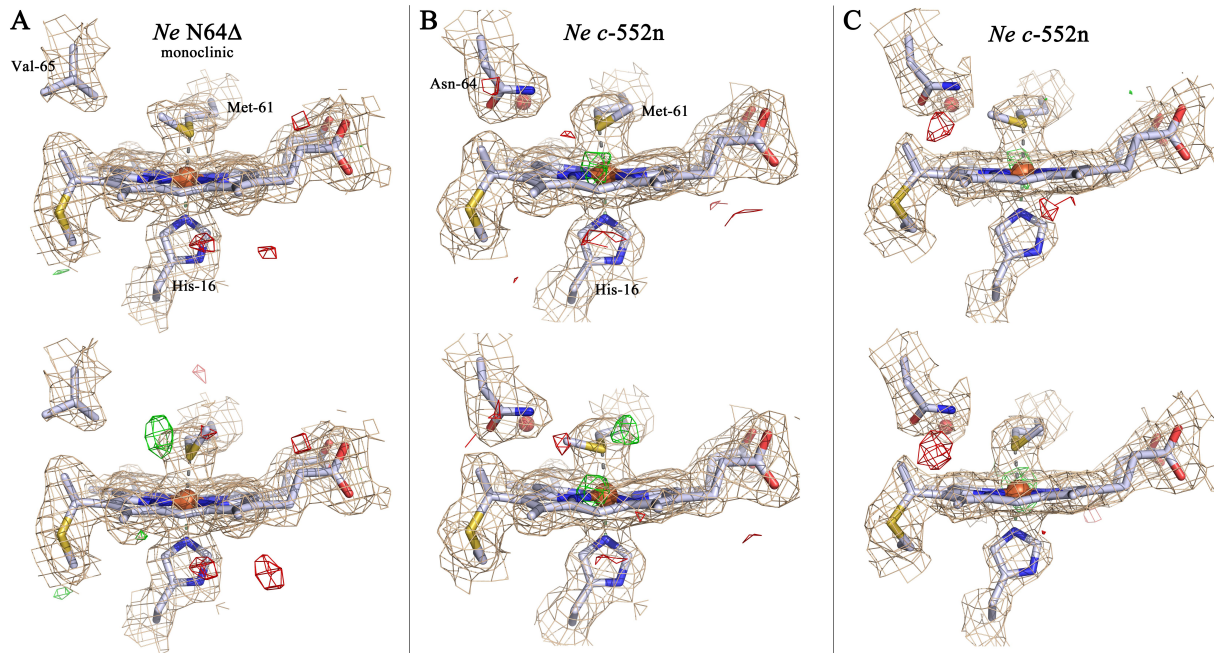

**Figure S2.** Structures and electron density maps of *Ne* N64 $\Delta$  (A) and *Ne* c-552n (two monomers with different Met orientation) (B,C) after refining with both *R* or *S* configuration of the sulfur Met-61 residue. The upper structures show the Met orientation for the published structures. The lower structures show the electron density after re-refining in the opposite Met orientation. The  $2F_o-F_c$  electron density maps (wheat) are shown at  $1\sigma$ , while the  $F_o-F_c$  electron density difference maps are contoured at  $+3\sigma$  (green) and  $-3\sigma$  (red).

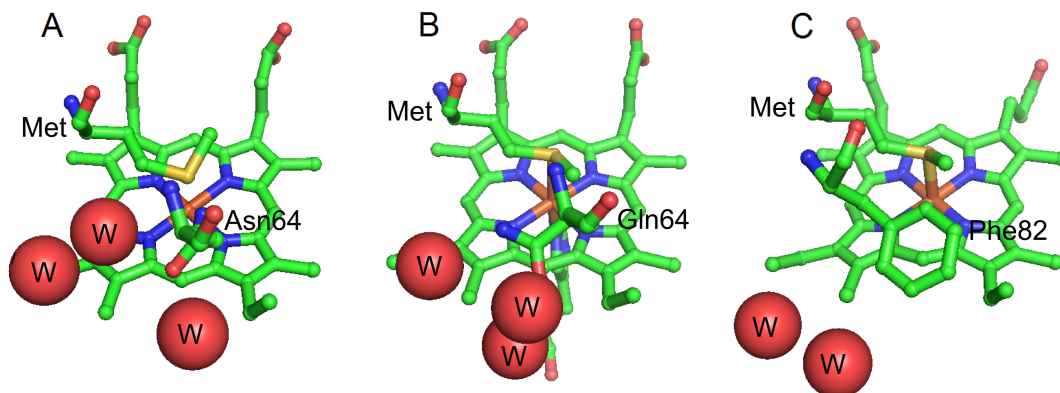

**Figure S3.** Residues and the water molecules (red spheres) near the heme and the axial Met for A) *Pa* c-551 (351C), B) *Ht* c-552 (1YNR), and C) horse cyt c (1HRC).
